# Supplementary material for: An adaptive and abductive approach to develop community capability for environmental conservation in Lake Biwa (Japan)
Source: Research Square preprint supplement (doi:10.21203/rs.3.rs-215768/v1), 2021-02-19
Supplement: Supplementary file 2 [file fdd5167c55fb9ef8ae3b5373.xlsx]

## Sheet: Table 1
No.	Month/Year	Venue	Number and attribute of participants	Major outcomes
1	11/2017	Kusatsu	12 (local NPO members, prefectural government and city officers)	To use composted weeds for planters at school, and gift them from graduates to new pupils
2	4/2018	Ōtsu	14 (Local NPO members, social entrepreneurs)	To make a herbarium using endogenous weeds at school
3	7/2018	Ōtsu	28 (social entrepreneurs, city officers, businesspeople)	To develop a point system to acknowledge voluntary beach cleaning and compost making
4	8/2018	Ōtsu	8 (student, fisherfolk, prefectural officers, flower shop owner, social entrepreneurs)	To change people's mind from “joyful“ (to join beach cleaning events) to “want” (Biwa Points as token of goodwill)
